# Supplementary material for: Histone 4 lysine 8 acetylation regulates proliferation and host–pathogen interaction in Plasmodium falciparum
Source: PubMed Central journal article supplement (PMC5568195; doi:10.1186/s13072-017-0147-z), 2017-08-22

# DNA replication

## Rings

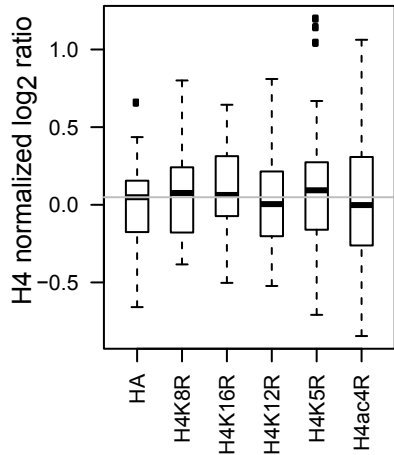

## Trophozoites

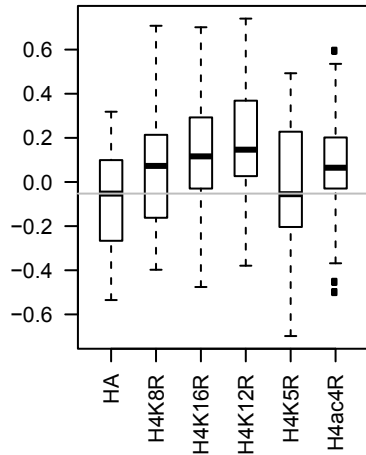

## Schizonts

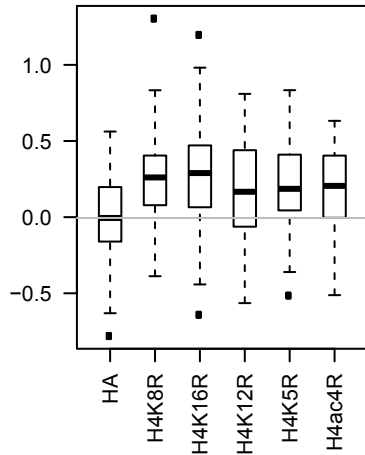

# Genes coding for components involved in ribosome assembly

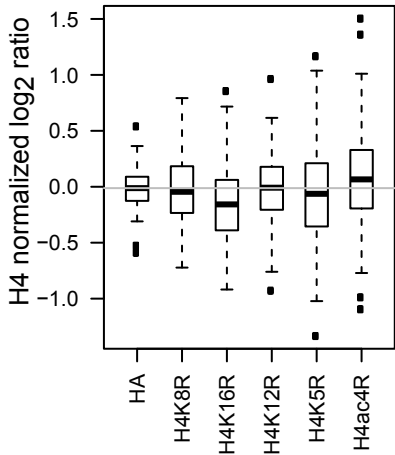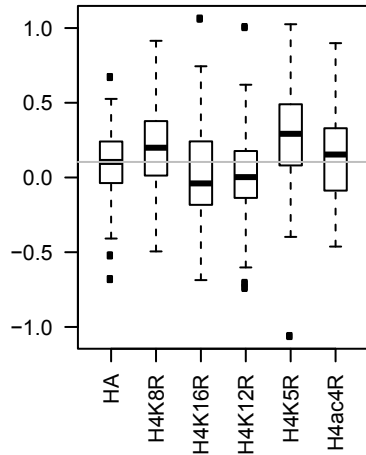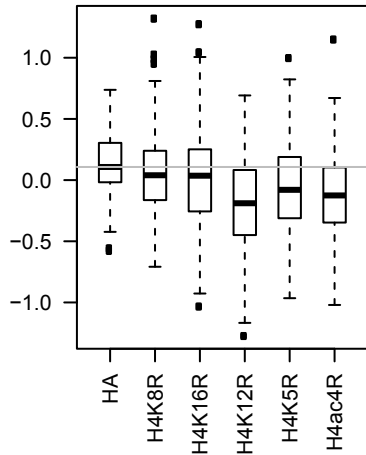

# Genes coding for transport proteins

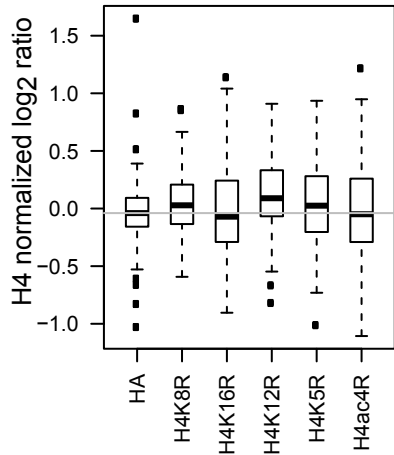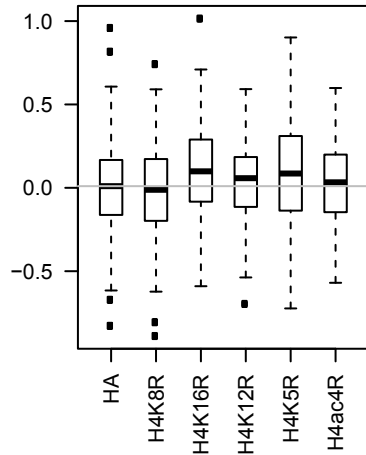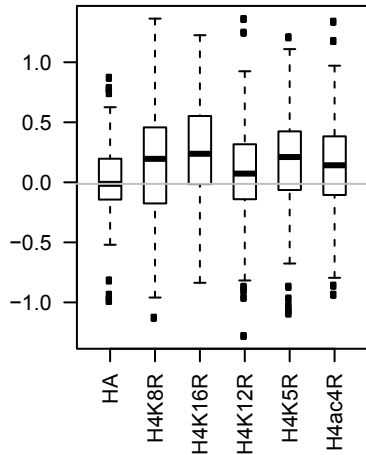

# Genes involved in excision repair

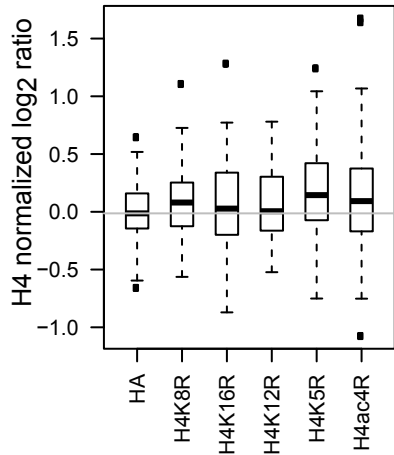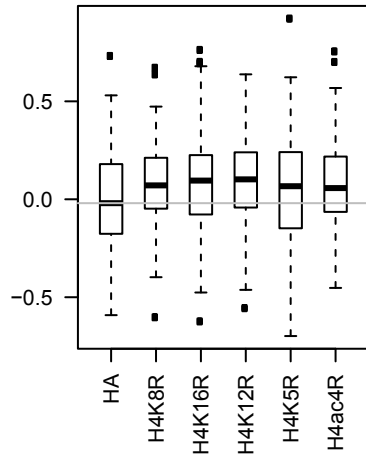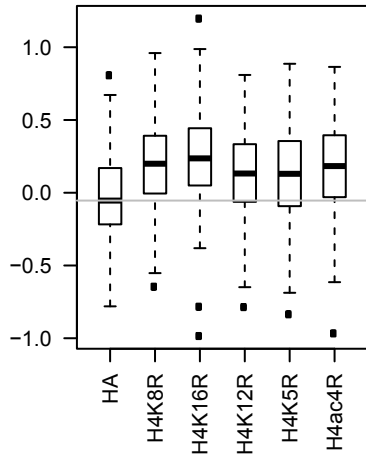

# Glycolysis

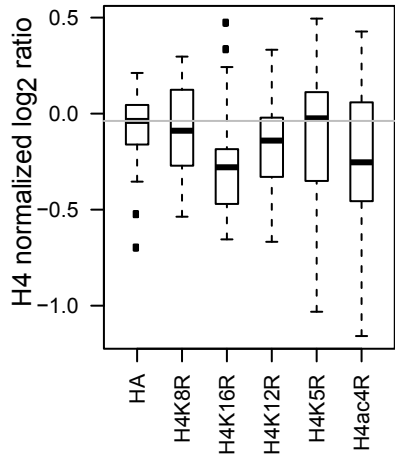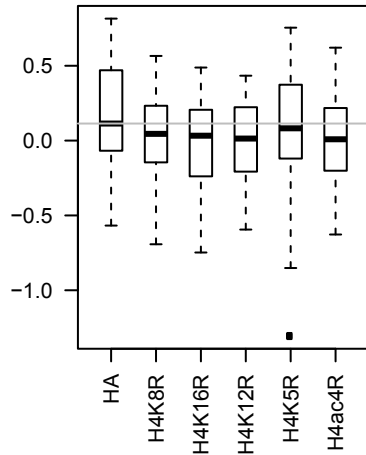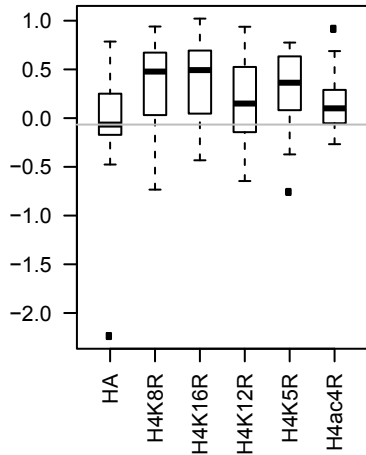

# Interactions between modified host cell membrane and endothelial cell

H4 normalized log<sub>2</sub> ratio

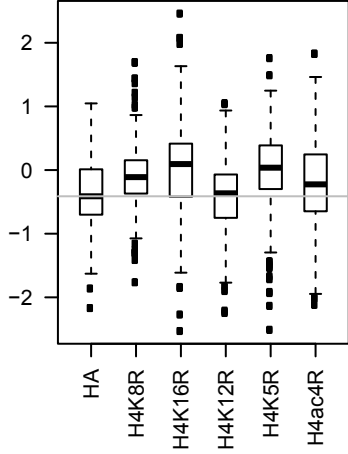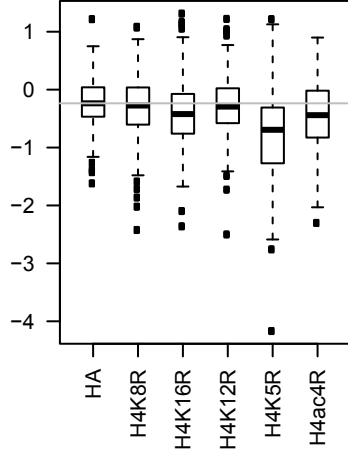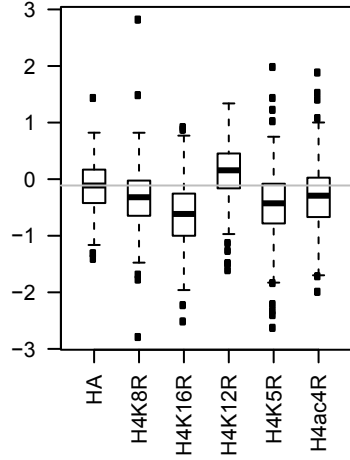

# Maturation and export of 60S and 40S ribosomal subunits

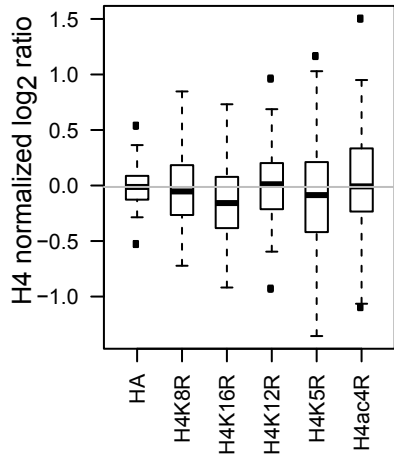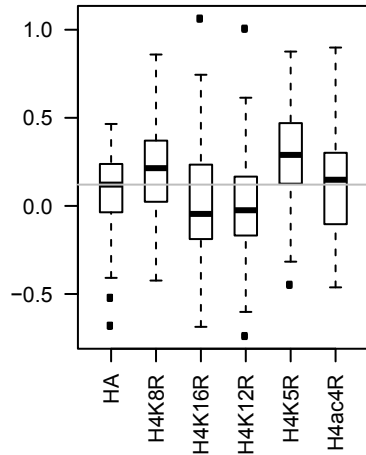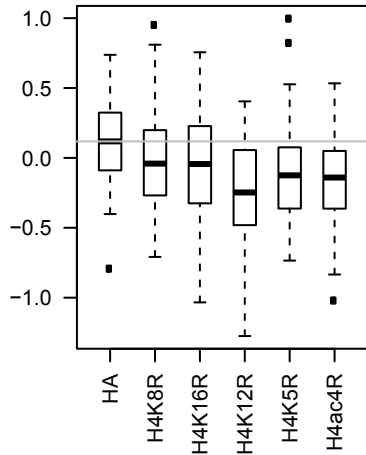

# Nuclear genes with apicoplast signal sequence

H4 normalized log<sub>2</sub> ratio

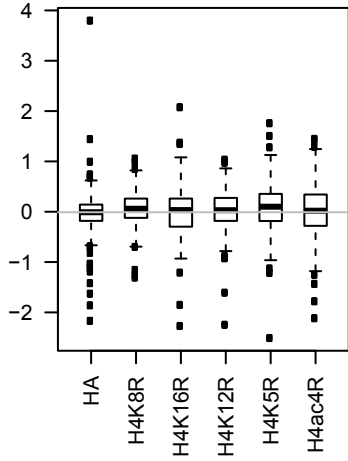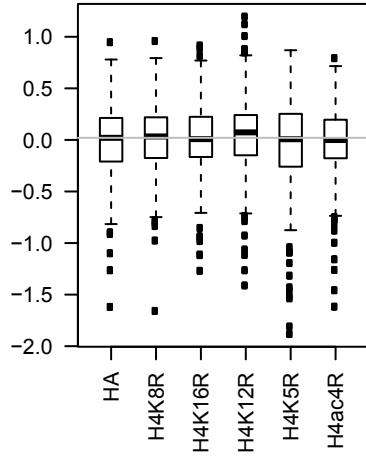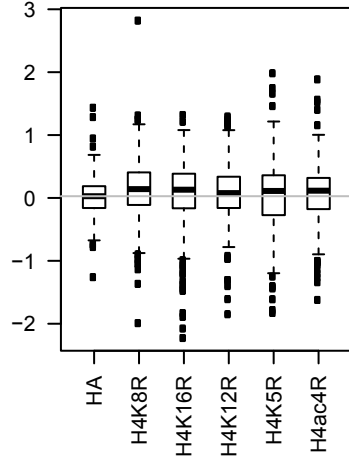



# Nuclear genes with mitochondrial signal sequence

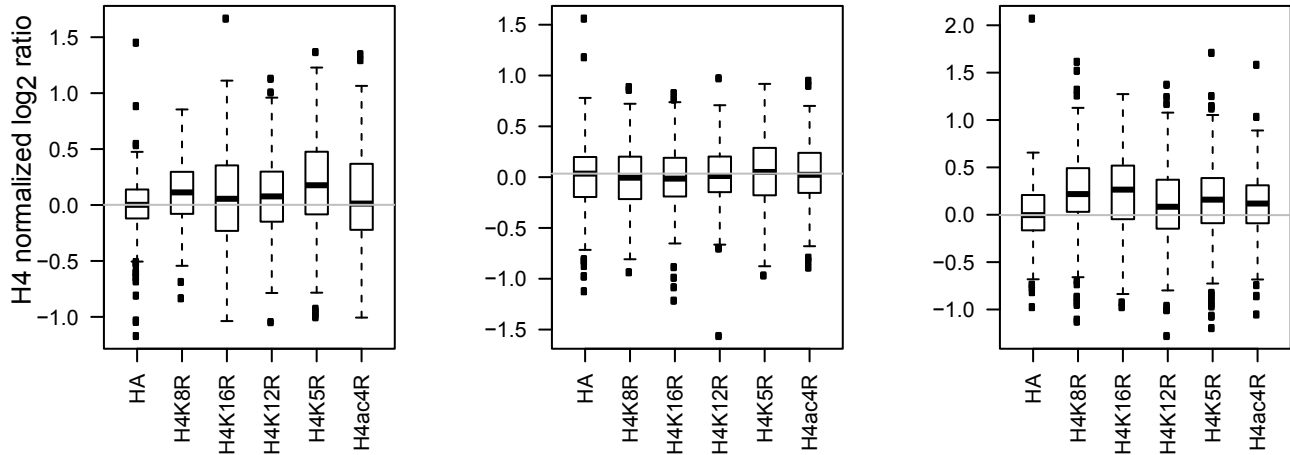

# Peptidases and proteases

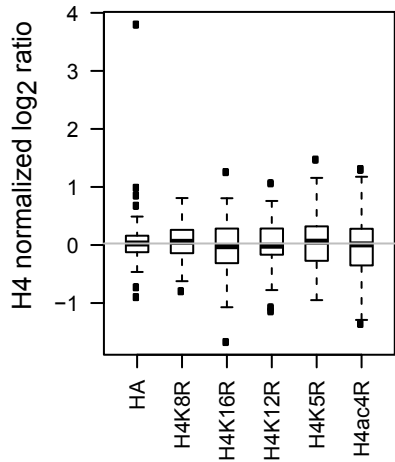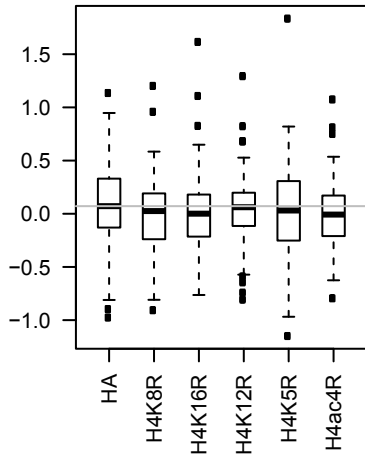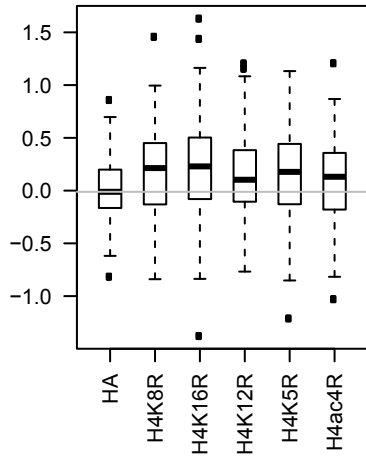

# Pfemp1 domain architectures

H4 normalized log<sub>2</sub> ratio

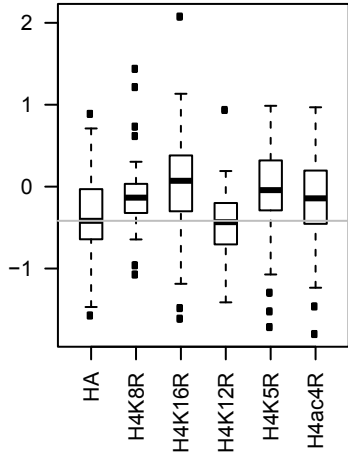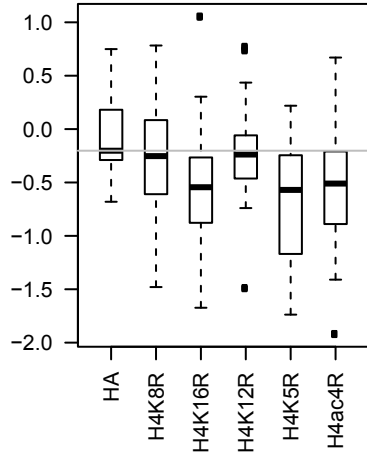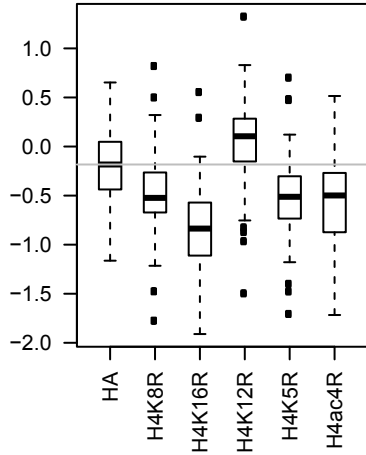

# Protein kinase coding genes

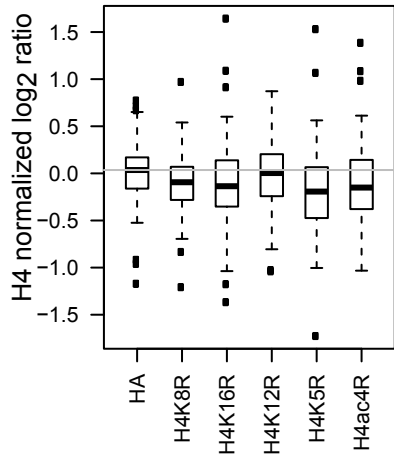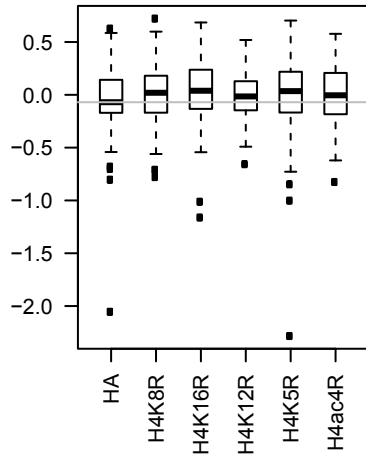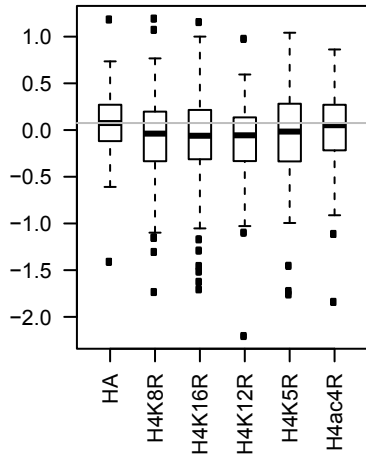

# Protein phosphorylation

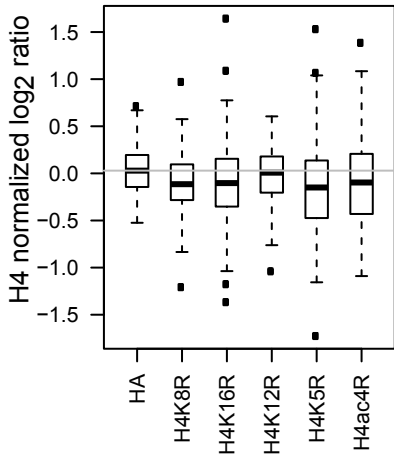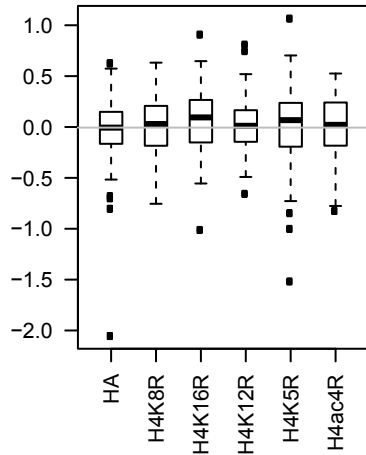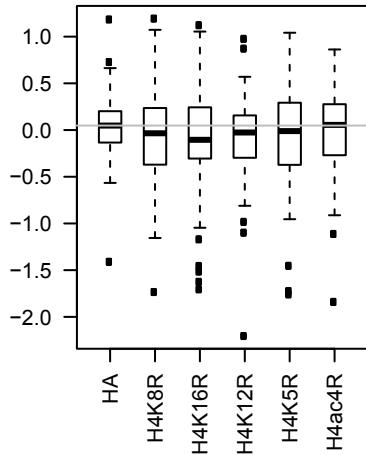

# Proteins targeted by the thioredoxin superfamily

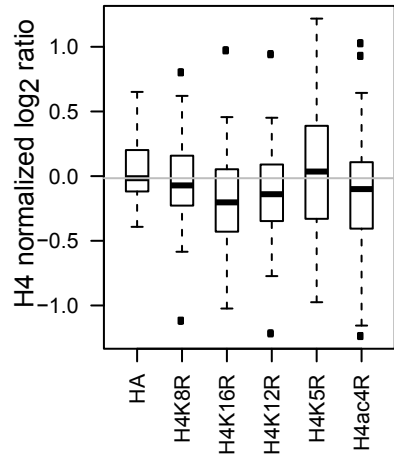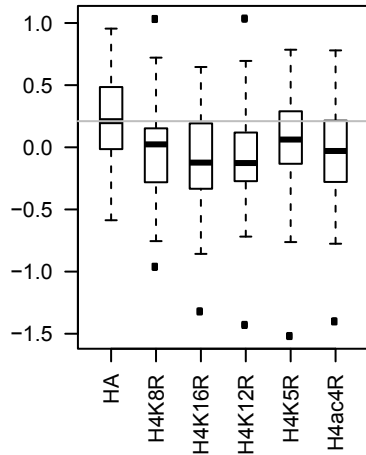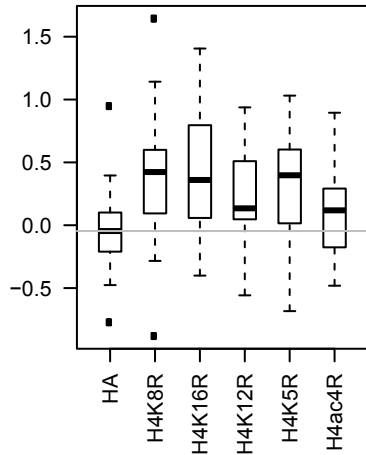

# Ribosome structure

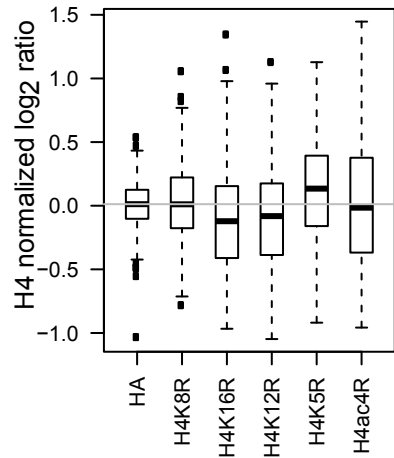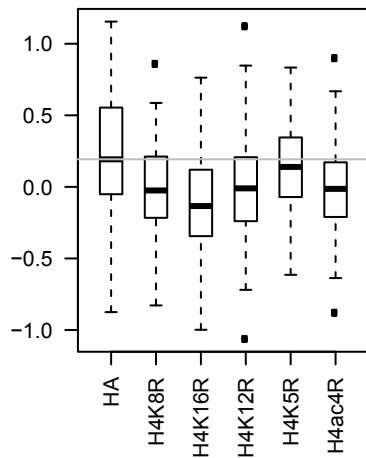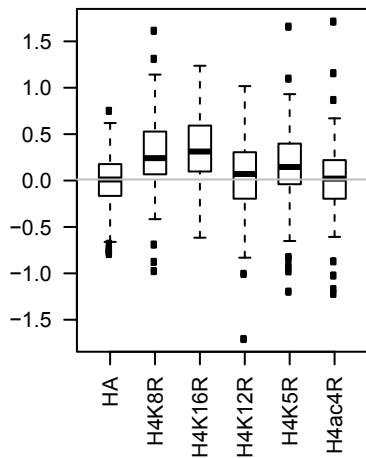

# Rosette formation between normal and infected RBC

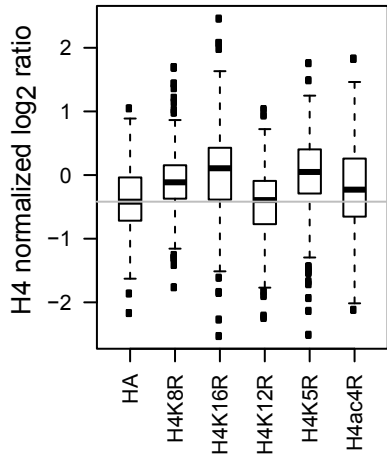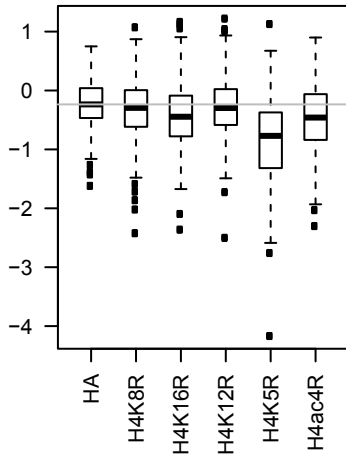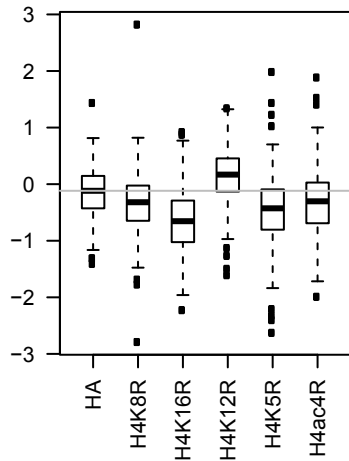



# Subcellular localization of proteins involved in invasion

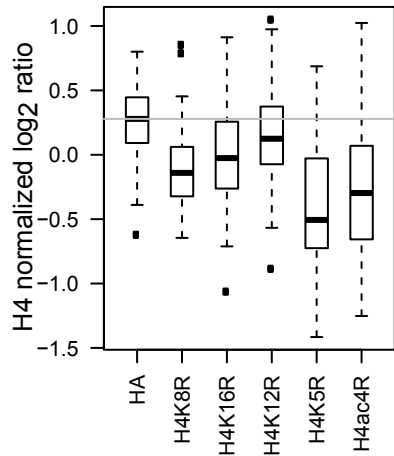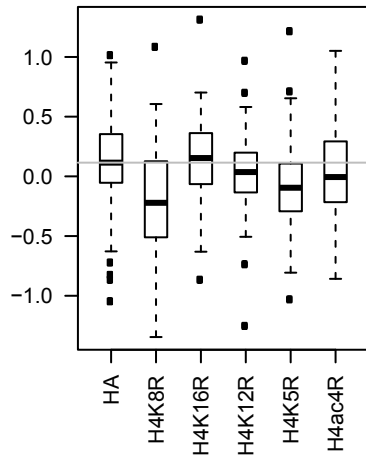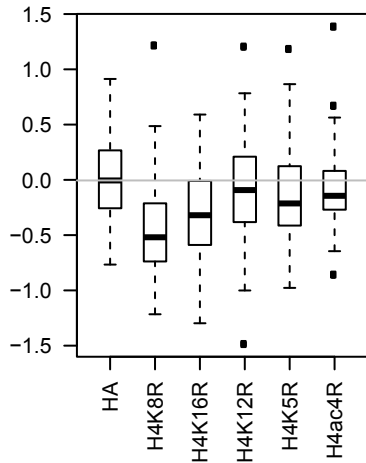

# Utilization of phospholipids

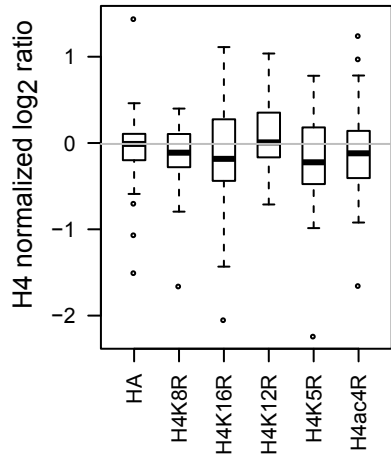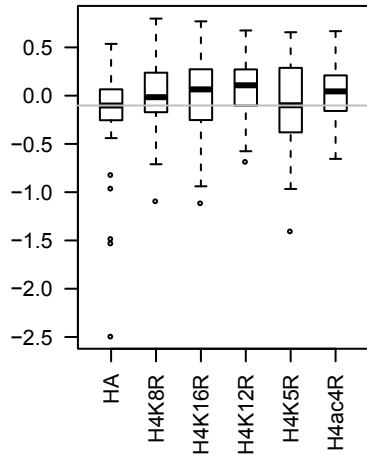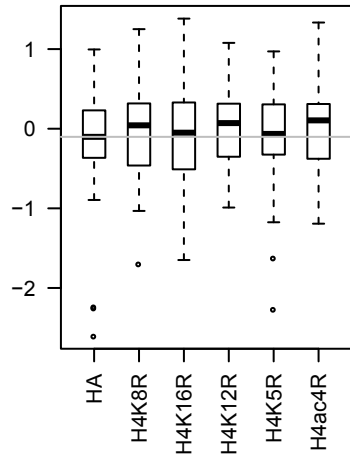

Supplement: 13072_2017_147_MOESM4_ESM.pdf [file 13072_2017_147_MOESM4_ESM.pdf]
