# Supplementary material for: Histone 4 lysine 8 acetylation regulates proliferation and host–pathogen interaction in Plasmodium falciparum
Source: PubMed Central journal article supplement (PMC5568195; doi:10.1186/s13072-017-0147-z), 2017-08-22

**a**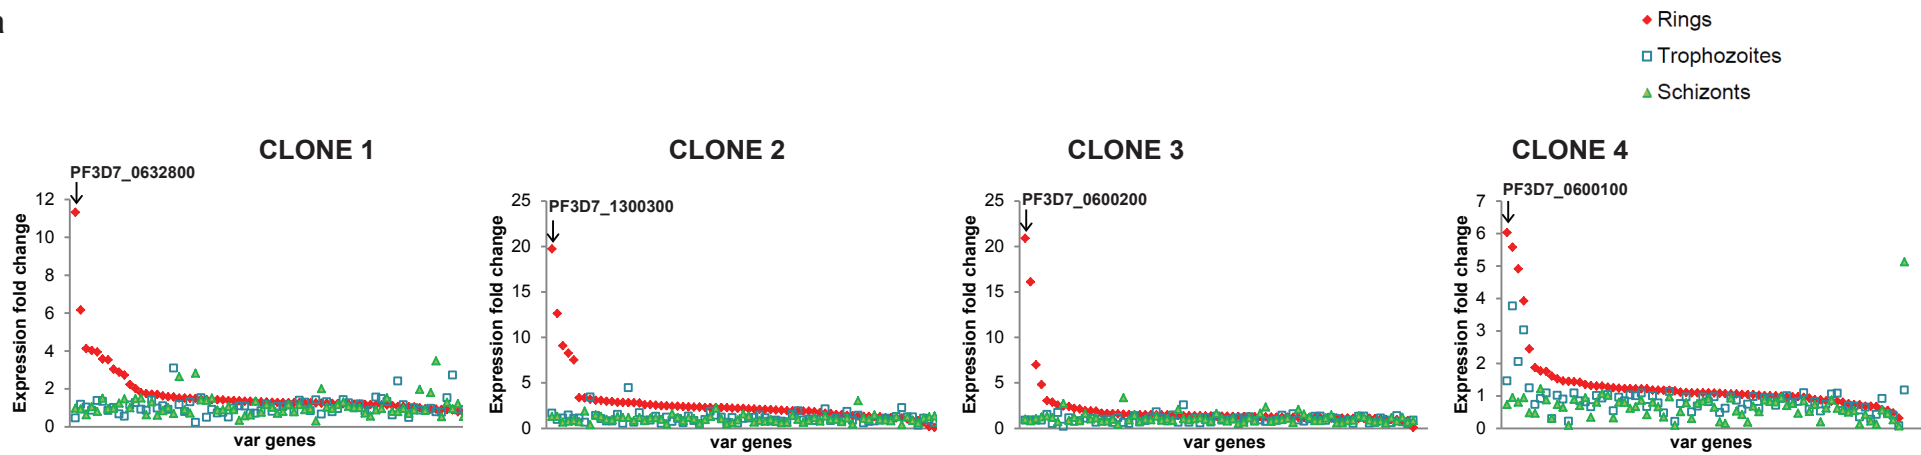**b**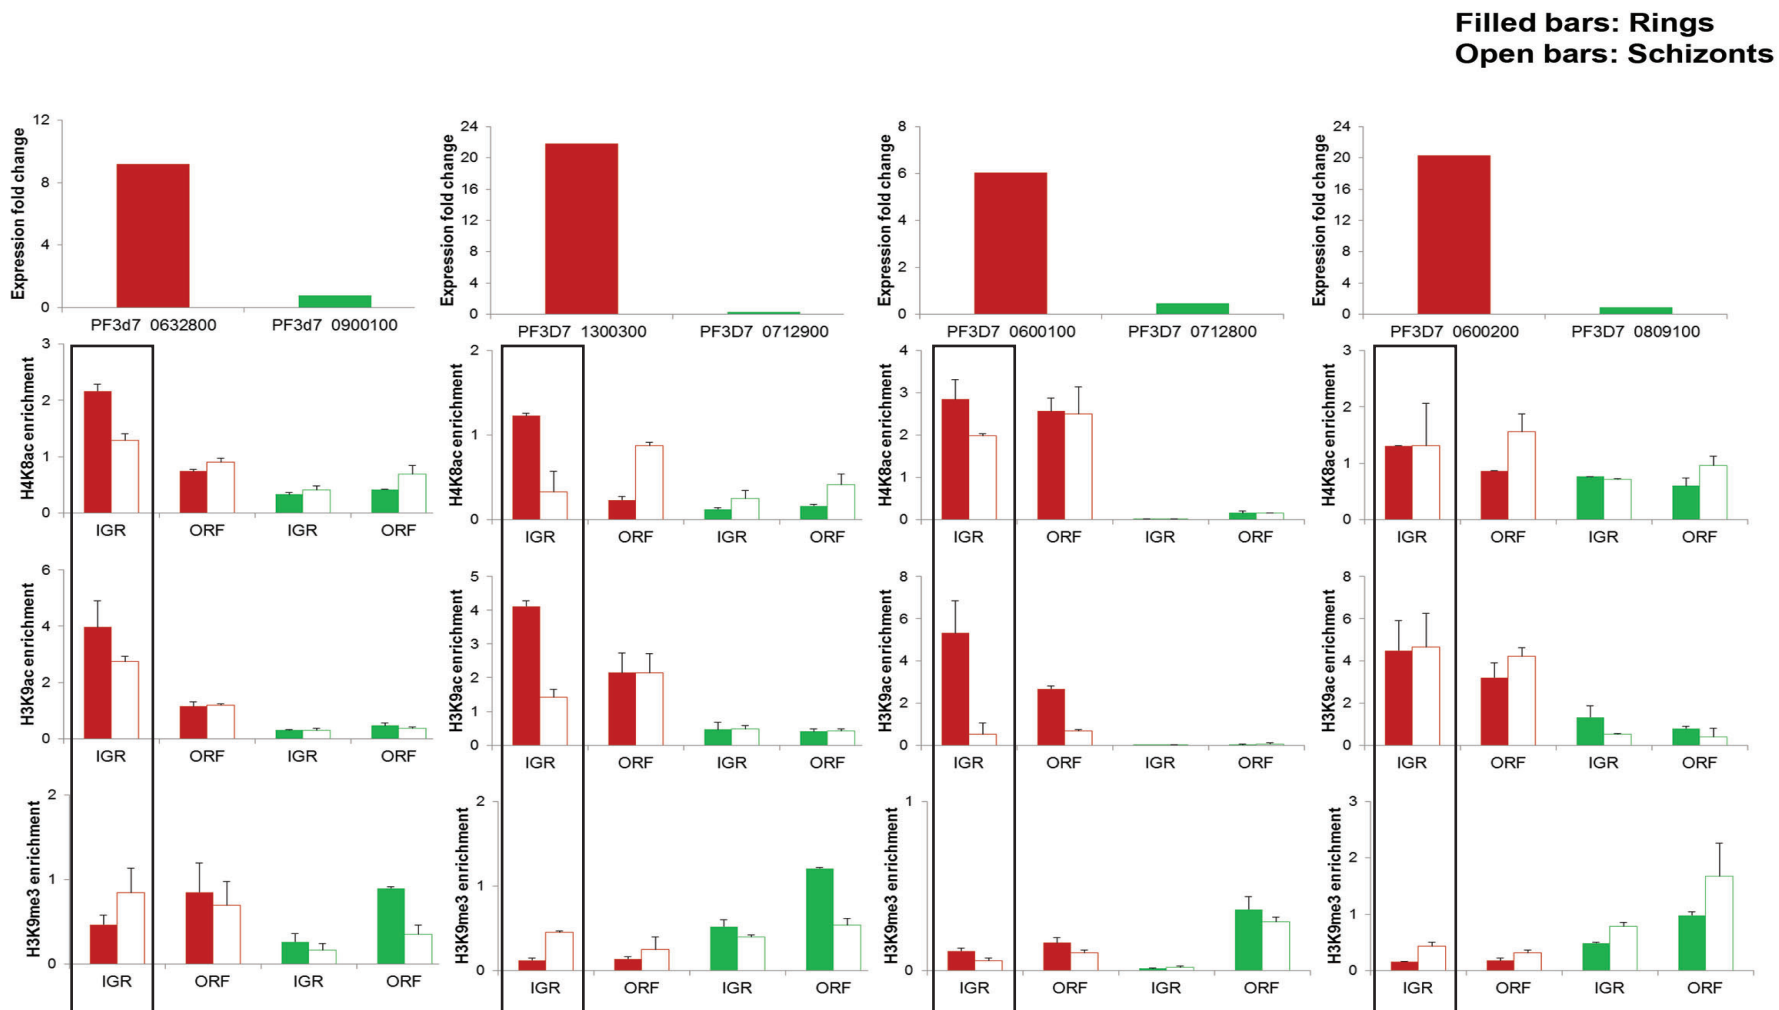

Supplement: 13072_2017_147_MOESM8_ESM.pdf [file 13072_2017_147_MOESM8_ESM.pdf]
